# Supplementary material
Source: PubMed Central journal article supplement (PMC7324511)
Supplement: supp_RA120.013595_159713_3_supp_525300_q9w4f4.pdf [file supp_RA120.013595_159713_3_supp_525300_q9w4f4.pdf]

## Supporting Information

### Structure of silkworm *Bombyx mori* sucrose hydrolase and substrate specificity of GH13 subfamily 17 *exo- $\alpha$* -glucosidases

Takatsugu Miyazaki\*, and Enoch Y. Park

Green Chemistry Research Division, Research Institute of Green Science and Technology, Shizuoka University, 836 Ohya, Suruga-ku, Shizuoka, 422-8529, Japan.

\*To whom correspondence should be addressed: Takatsugu Miyazaki, Green Chemistry Research Division, Research Institute of Green Science and Technology, Shizuoka University, 836 Ohya, Suruga-ku, Shizuoka, 422-8529, Japan; Tel & Fax: +81-54-238-4886; E-mail: [miyazaki.takatsugu@shizuoka.ac.jp](mailto:miyazaki.takatsugu@shizuoka.ac.jp)

#### **This file includes:**

**Supplementary Table S1.** Enzymes structurally homologous to BmSUH.

**Supplementary Table S2.** Sequences of oligonucleotides used in this study.

**Supplementary Table S3.** GH13\_17 proteins used in the phylogenetic analysis in Figure 6.

**Supplementary Figure S1.** Effects of pH and temperature on the recombinant BmSUH hydrolysis of sucrose.

**Supplementary Figure S2.** Structures of *exo*-acting GH13 enzymes homologous to BmSUH.

**Supplementary Figure S3.** Metal binding sites of BmSUH.

**Supplementary Figure S4.** Dimeric structures of BmSUH and Cqm1.

**Supplementary Figure S5.** Sequence alignment of GH13\_17 enzymes.

**Supplementary Figure S6.** Sequence alignment of *exo*-acting enzymes belonging to GH13\_16, 17, 23, 29, 31, and 40 subfamilies.

**Supplementary Table S1. Enzymes structurally homologous to BmSUH.**

| Enzyme                                                                                          | GH family            | PDB code | Z score | RMSD (Å) | Sequence identity (%) |
|-------------------------------------------------------------------------------------------------|----------------------|----------|---------|----------|-----------------------|
| <i>Culex quinquefasciatus</i> maltase Cqml                                                      | GH13_17              | 6K5P     | 54.1    | 1.3      | 44                    |
| <i>Listeria monocytogenes</i> $\alpha$ -1,6-glucosidase                                         | GH13_31              | 5DO8     | 47.5    | 2.4      | 33                    |
| <i>Pseudomonas mesoacidophila</i> sucrose isomerase                                             | GH13_31              | 2PWH     | 47.2    | 2.2      | 32                    |
| <i>Bacillus subtilis</i> oligo- $\alpha$ -1,6-glucosidase                                       | GH13_31              | 4M56     | 46.3    | 2.3      | 32                    |
| <i>Xanthomonas campestris</i> $\alpha$ -glucosyltransferase                                     | GH13_23              | 6AAV     | 44.6    | 2.3      | 33                    |
| <i>Bacillus</i> sp. AHU2216 $\alpha$ -glucosidase                                               | GH13_31              | 5ZCD     | 44.4    | 2.1      | 33                    |
| <i>Halomonas</i> sp. H11 $\alpha$ -glucosidase                                                  | GH13_23              | 3WY1     | 44.2    | 2.3      | 33                    |
| <i>Lactobacillus acidophilus</i> glucan $\alpha$ -1,6-glucosidase                               | GH13_31              | 4AIE     | 43.8    | 2.1      | 32                    |
| <i>Deinococcus radiodurans</i> trehalose synthase                                               | GH13_16              | 4WF7     | 43.7    | 2.6      | 29                    |
| <i>Streptococcus mutans</i> dextran $\alpha$ -1,6-glucosidase                                   | GH13_31              | 4WLC     | 43.5    | 2.2      | 32                    |
| <i>Klebsiella</i> sp. LX3 isomaltulose synthase                                                 | GH13_31              | 1M53     | 42.4    | 2.3      | 31                    |
| <i>Protaminobacter rubrum</i> sucrose isomerase                                                 | GH13_31              | 3GBE     | 41.8    | 2.3      | 32                    |
| <i>Mycolicibacterium smegmatis</i> trehalose synthase                                           | GH13_16              | 5JY7     | 41.7    | 2.7      | 29                    |
| <i>Bacillus cereus</i> oligo- $\alpha$ -1,6-glucosidase                                         | GH13_31              | 1UOK     | 41.4    | 2.2      | 33                    |
| <i>Erwinia rhapontici</i> isomaltulose synthase                                                 | GH13_31              | 4HP5     | 41.2    | 2.3      | 31                    |
| <i>Thermomonospora curvata</i> trehalose synthase                                               | GH13_16              | 5H2T     | 41.1    | 2.7      | 30                    |
| <i>Bacillus licheniformis</i> trehalose-6-phosphate hydrolase                                   | GH13_29              | 5BRP     | 41.0    | 2.6      | 32                    |
| <i>Thermobaculum terrenum</i> trehalose synthase                                                | GH13_16              | 5X7U     | 40.7    | 2.5      | 28                    |
| <i>Geobacillus</i> sp. HTA-462 $\alpha$ -glucosidase                                            | GH13_31              | 2ZE0     | 40.4    | 2.4      | 32                    |
| <i>Saccharomyces cerevisiae</i> oligo- $\alpha$ -1,6-glucosidase                                | GH13_40              | 3AXH     | 39.8    | 2.7      | 29                    |
| <i>Bacteroides thetaiotaomicron</i> $\alpha$ -amylase                                           | GH13_36              | 3K8I     | 39.8    | 2.5      | 24                    |
| <i>Arthrobacter globiformis</i> cyclic maltosyl-maltose hydrolase                               | GH13_20              | 5ZXG     | 38.4    | 2.5      | 23                    |
| <i>Thermoactinomyces vulgaris</i> $\alpha$ -amylase TVAI                                        | GH13_20              | 1JIB     | 38.1    | 2.5      | 25                    |
| <i>Thermotoga maritima</i> 4- $\alpha$ -glucanotransferase                                      | GH13_NC <sup>a</sup> | 1LWJ     | 37.1    | 2.6      | 24                    |
| <i>Anoxybacillus</i> sp. SK3-4 $\alpha$ -amylase                                                | GH13_NC              | 5A2A     | 36.9    | 2.5      | 23                    |
| <i>Neisseria polysaccharea</i> amylosucrase                                                     | GH13_4               | 1MW1     | 36.8    | 2.5      | 21                    |
| <i>Geobacillus stearothermophilus</i> neopullulanase                                            | GH13_20              | 1J0I     | 36.6    | 2.4      | 24                    |
| <i>Thermus</i> sp. IM6501 maltogenic $\alpha$ -amylase                                          | GH13_20              | 1GVI     | 36.3    | 2.5      | 23                    |
| <i>Thermus thermophilus</i> HB8 TTHA1563                                                        | GH13_20              | 2Z1K     | 35.8    | 2.7      | 20                    |
| <i>Bacillus</i> sp. I-5 cyclomaltodextrinase                                                    | GH13_20              | 1EA9     | 35.4    | 2.5      | 22                    |
| <i>Thermoactinomyces vulgaris</i> $\alpha$ -amylase TVAI                                        | GH13_21              | 2D0G     | 35.2    | 2.8      | 21                    |
| <i>Lactobacillus plantarum</i> $\alpha$ -amylase                                                | GH13_NC              | 3DHU     | 34.2    | 2.4      | 20                    |
| <i>Pyrococcus furiosus</i> $\alpha$ -amylase                                                    | GH13_20              | 4AEF     | 33.9    | 2.5      | 24                    |
| <i>Streptomyces coelicolor</i> $\alpha$ -1,4-glucan: phosphate $\alpha$ -maltosyltransferase    | GH13_3               | 3ZSS     | 33.7    | 2.8      | 16                    |
| <i>Thermococcus kodakarensis</i> amylopullulanase                                               | GH13_20              | 5OT1     | 33.4    | 2.6      | 23                    |
| <i>Mycobacterium tuberculosis</i> $\alpha$ -1,4-glucan: phosphate $\alpha$ -maltosyltransferase | GH13_3               | 4U33     | 33.2    | 2.9      | 13                    |
| <i>Thermotoga petrophila</i> $\alpha$ -amylase                                                  | GH13_36              | 5M99     | 33.1    | 2.9      | 23                    |
| <i>Xanthomonas axonopodis</i> pv. <i>glycines</i> sucrose hydrolase                             | GH13_4               | 3CZL     | 31.3    | 2.6      | 19                    |
| <i>Bifidobacterium adolescentis</i> sucrose phosphorylase                                       | GH13_18              | 6FME     | 29.7    | 2.5      | 18                    |
| <i>Xanthomonas campestris</i> pv. <i>campestris</i> sucrose hydrolase                           | GH13_4               | 2WPG     | 27.7    | 2.7      | 20                    |

<sup>a</sup> Not classified into any subfamilies according to the CAZy database.

**Supplementary Table S2. Sequences of oligonucleotides used in this study.**

| Oligonucleotide | Sequence (5'→3') <sup>a</sup>           |
|-----------------|-----------------------------------------|
| BmSUH_F         | TTTT <u>CATATG</u> TCAAATCAAATGCGCCAAC  |
| BmSUH_R         | TTTT <u>CTCGAG</u> TTATATAGGTTGGGCTTTCA |
| Q191V_F         | GGTCAGTGTGTTTCGGAGGTTTCGGCCTGGGA        |
| Q191V_R         | TCCGAACACACTGACCCAATTAGAAGGAGG          |
| D247N_F         | TCAGACTAAATGCTCTACCGTATTTGATTG          |
| D247N_R         | TAGAGCATTTAGTCTGAAGCCGTCAGCTCC          |
| Y251H_F         | TCTACCGCATTTGATTGAAGCTGATCCAGC          |
| Y251H_R         | ATCAAATGCGGTAGAGCATCTAGTCTGAAG          |
| E322Q_F         | TGTTCTCACAAGGGTATGCCAACGTGTCTA          |
| E322Q_R         | ATACCCTTGTGAGAACCACTCTGGTATC            |
| E440A_F         | GGACATAGCAGCCTGTAACCGGGGAGACC           |
| E440A_R         | TACAGGCTGCTATGTCCACAGTGTCTTCC           |

<sup>a</sup> Restriction sites are underlined.

**Supplementary Table S3. GH13\_17 proteins used in the phylogenetic analysis in Figure 6.**

| Name <sup>a</sup>           | Species                         | GenBank accession number |
|-----------------------------|---------------------------------|--------------------------|
| APS1                        | <i>Acyrtosiphon pisum</i>       | ABB55878.1               |
| AAEL000392-PA               | <i>Aedes aegypti</i>            | EAT48590.1               |
| AAEL000667-PA               | <i>Aedes aegypti</i>            | EAT48296.1               |
| AAEL003434-PA               | <i>Aedes aegypti</i>            | EAT45278.1               |
| AAEL009524-PA               | <i>Aedes aegypti</i>            | EAT38606.1               |
| AAEL010532-PA               | <i>Aedes aegypti</i>            | EAT37483.1               |
| AAEL010536-PA               | <i>Aedes aegypti</i>            | EAT37482.1               |
| <b>Aam1 (AAEL010537-PA)</b> | <i>Aedes aegypti</i>            | EAT37485.1               |
| AAEL014710-PA               | <i>Aedes aegypti</i>            | EAT33036.1               |
| AtSUH                       | <i>Amyelois transitella</i>     | XP_013192965.1           |
| AtMal1                      | <i>Amyelois transitella</i>     | XP_013201068.1           |
| AtMal2                      | <i>Amyelois transitella</i>     | XP_013201277.1           |
| AtMal3_1                    | <i>Amyelois transitella</i>     | XP_013201279.1           |
| AtMal3_2                    | <i>Amyelois transitella</i>     | XP_013201280.1           |
| AtMal4                      | <i>Amyelois transitella</i>     | XP_013201278.1           |
| alpha-amylase               | <i>Anopheles albimanus</i>      | ADD81256.1               |
| alpha-amylase               | <i>Anopheles darlingi</i>       | ETN61169.1               |
| alpha-amylase               | <i>Anopheles darlingi</i>       | ETN63249.1               |
| alpha-glucosidase           | <i>Anopheles darlingi</i>       | ETN63250.1               |
| alpha-glucosidase           | <i>Anopheles darlingi</i>       | ETN65874.1               |
| alpha-amylase               | <i>Anopheles darlingi</i>       | ETN65875.1               |
| alpha-amylase               | <i>Anopheles darlingi</i>       | ETN67705.1               |
| Agm1                        | <i>Anopheles gambiae</i>        | CAA60857.1               |
| Agm2                        | <i>Anopheles gambiae</i>        | CAA60858.1               |
| Agm3                        | <i>Anopheles gambiae</i>        | ABW98683.1               |
| alpha-amylase               | <i>Antheraea pernyi</i>         | AJR29308.1               |
| AciHBG-I                    | <i>Apis cerana indica</i>       | AGE11865.1               |
| <b>AciHBG-II</b>            | <i>Apis cerana indica</i>       | AFR59339.1               |
| AciHBG-III                  | <i>Apis cerana indica</i>       | ABO27432.1               |
| <b>JBgI</b>                 | <i>Apis cerana japonica</i>     | BAF44218.1               |
| JBgII                       | <i>Apis cerana japonica</i>     | ACN63343.1               |
| JBgIII                      | <i>Apis cerana japonica</i>     | ACQ45697.1               |
| AdMal                       | <i>Apis dorsata</i>             | ADB11049.1               |
| <b>HBG-I</b>                | <i>Apis mellifera</i>           | BAE86926.1               |
| <b>HBG-II</b>               | <i>Apis mellifera</i>           | BAE86927.1               |
| <b>HBG-III</b>              | <i>Apis mellifera</i>           | BAA11466.1               |
| BdMalA1                     | <i>Bactrocera dorsalis</i>      | AIT38256.1               |
| alpha-glucosidase           | <i>Bombus ignitus</i>           | BAI44030.1               |
| alpha-glucosidase           | <i>Bombus diversus diversus</i> | BAI44029.1               |
| BmaSUH                      | <i>Bombyx mandarina</i>         | XP_028038901.1           |
| BmaSUH2                     | <i>Bombyx mandarina</i>         | XP_028038902.1           |
| BmaMal3                     | <i>Bombyx mandarina</i>         | XP_028034157.1           |

|                        |                                   |                |
|------------------------|-----------------------------------|----------------|
| BmaMal4                | <i>Bombyx mandarina</i>           | XP_028034158.1 |
| <b>BmSUH</b>           | <i>Bombyx mori</i>                | BAP18683.1     |
| BmSUH2                 | <i>Bombyx mori</i>                | BBE00602.1     |
| BmMal2                 | <i>Bombyx mori</i>                | XP_012549946.2 |
| BmMal3                 | <i>Bombyx mori</i>                | BBD49474.1     |
| BmMal4                 | <i>Bombyx mori</i>                | BBD13387.1     |
| alpha-glucosidase      | <i>Camponotus japonicus</i>       | BAO48210.1     |
| Cpm1                   | <i>Culex pipiens</i>              | AAL05443.1     |
| <b>Cqm1</b>            | <i>Culex quinquefasciatus</i>     | ASO96882.1     |
| maltase                | <i>Culicoides nubeculosus</i>     | ACM40914.1     |
| Cul o 1 allergen       | <i>Culicoides obsoletus</i>       | AGI16774.1     |
| maltase                | <i>Culicoides sonorensis</i>      | AAU06480.1     |
| venom polypeptide      | <i>Dolopus genitalis</i>          | AYV99560.1     |
| DpSUH1                 | <i>Danaus plexippus plexippus</i> | OWR49826.1     |
| DpSUH2                 | <i>Danaus plexippus plexippus</i> | OWR49828.1     |
| DpMal1                 | <i>Danaus plexippus plexippus</i> | OWR49357.1     |
| DpMal2                 | <i>Danaus plexippus plexippus</i> | OWR49126.1     |
| DpMal3                 | <i>Danaus plexippus plexippus</i> | OWR49124.1     |
| DpMal4                 | <i>Danaus plexippus plexippus</i> | OWR49125.1     |
| DbMalA1                | <i>Drosophila busckii</i>         | ALC40924.1     |
| DbMalA2                | <i>Drosophila busckii</i>         | ALC40926.1     |
| DbMalA3                | <i>Drosophila busckii</i>         | ALC40927.1     |
| DbMalA4                | <i>Drosophila busckii</i>         | ALC40928.1     |
| DbMalA5                | <i>Drosophila busckii</i>         | ALC40929.1     |
| DbMalA6                | <i>Drosophila busckii</i>         | ALC40930.1     |
| DbMalA7                | <i>Drosophila busckii</i>         | ALC40931.1     |
| DbMalA8                | <i>Drosophila busckii</i>         | ALC40932.1     |
| DbMalB1                | <i>Drosophila busckii</i>         | ALC39348.1     |
| DmMalA1                | <i>Drosophila melanogaster</i>    | AAF59089.3     |
| DmMalA2                | <i>Drosophila melanogaster</i>    | AAF59088.1     |
| DmMalA3                | <i>Drosophila melanogaster</i>    | AAM50308.1     |
| DmMalA4                | <i>Drosophila melanogaster</i>    | AAF59086.1     |
| DmMalA5                | <i>Drosophila melanogaster</i>    | AAV36953.1     |
| DmMalA6                | <i>Drosophila melanogaster</i>    | AAM68846.2     |
| DmMalA7                | <i>Drosophila melanogaster</i>    | AAF59084.2     |
| DmMalA8                | <i>Drosophila melanogaster</i>    | AAF59083.2     |
| DmMalB1                | <i>Drosophila melanogaster</i>    | AAF53127.1     |
| DmMalB2                | <i>Drosophila melanogaster</i>    | AAF53128.4     |
| DvMalB1                | <i>Drosophila virilis</i>         | AAB82327.1     |
| DvMalB2                | <i>Drosophila virilis</i>         | AAB82328.1     |
| maltase 1-like protein | <i>Habrobracon hebetor</i>        | AXY94681.1     |
| HaSUH1                 | <i>Helicoverpa armigera</i>       | XP_021191332.1 |
| HaSUH2                 | <i>Helicoverpa armigera</i>       | XP_021191328.1 |
| HaMal1_1               | <i>Helicoverpa armigera</i>       | XP_021188630.1 |
| HaMal1_2               | <i>Helicoverpa armigera</i>       | XP_021188631.1 |

|                   |                                  |                |
|-------------------|----------------------------------|----------------|
| HaMal2            | <i>Helicoverpa armigera</i>      | XP_021193832.1 |
| HaMal3            | <i>Helicoverpa armigera</i>      | XP_021193831.1 |
| HaMal4            | <i>Helicoverpa armigera</i>      | XP_021193829.1 |
| MsSUH             | <i>Manduca sexta</i>             | XP_030027415.1 |
| MsSUH2            | <i>Manduca sexta</i>             | XP_030027440.1 |
| MsMal1            | <i>Manduca sexta</i>             | XP_030034371.1 |
| MsMal2            | <i>Manduca sexta</i>             | XP_030035809.1 |
| MsMal3            | <i>Manduca sexta</i>             | XP_030031300.1 |
| MsMal4            | <i>Manduca sexta</i>             | XP_030035812.1 |
| MdMalA1           | <i>Musca domestica</i>           | AFP60283.1     |
| MdMalA2           | <i>Musca domestica</i>           | AFP59562.1     |
| MdMalA4           | <i>Musca domestica</i>           | AFP62365.1     |
| MdMalA7           | <i>Musca domestica</i>           | AFP62166.1     |
| MdMalB1           | <i>Musca domestica</i>           | AFP61790.1     |
| alpha-amylase     | <i>Musca domestica</i>           | AFP62021.1     |
| sucrase           | <i>Myzus persicae</i>            | AKM95031.1     |
| NIMalA1           | <i>Nilaparvata lugens</i>        | AQW43009.1     |
| NIMalA2           | <i>Nilaparvata lugens</i>        | ANJ04656.1     |
| NISUH             | <i>Nilaparvata lugens</i>        | AEO89448.1     |
| PmSUH1            | <i>Papilio machaon</i>           | XP_014360940.1 |
| PmSUH2            | <i>Papilio machaon</i>           | XP_014360941.1 |
| PmMal1            | <i>Papilio machaon</i>           | XP_014371748.1 |
| PmMal2            | <i>Papilio machaon</i>           | XP_014368521.1 |
| PmMal3_1          | <i>Papilio machaon</i>           | XP_014368517.1 |
| PmMal3_2          | <i>Papilio machaon</i>           | XP_014368519.1 |
| PmMal4            | <i>Papilio machaon</i>           | XP_014368518.1 |
| <b>PpSUH1</b>     | <i>Papilio polytes</i>           | XP_013147169.1 |
| <b>PpSUH2</b>     | <i>Papilio polytes</i>           | XP_013147171.1 |
| PpMal1            | <i>Papilio polytes</i>           | XP_013137112.1 |
| PpMal3_1          | <i>Papilio polytes</i>           | XP_013136071.1 |
| PpMal3_2          | <i>Papilio polytes</i>           | XP_013136068.1 |
| PpMal4            | <i>Papilio polytes</i>           | XP_013136069.1 |
| PxSUH1            | <i>Papilio xuthus</i>            | XP_013161261.1 |
| PxSUH2            | <i>Papilio xuthus</i>            | XP_013161263.1 |
| PxMal1            | <i>Papilio xuthus</i>            | XP_013177984.1 |
| PxMal2            | <i>Papilio xuthus</i>            | XP_013168325.1 |
| PxMal3_1          | <i>Papilio xuthus</i>            | XP_013168326.1 |
| PxMal3_2          | <i>Papilio xuthus</i>            | XP_013168328.1 |
| PxMal4            | <i>Papilio xuthus</i>            | XP_013168327.1 |
| alpha-glucosidase | <i>Periplaneta americana</i>     | AIA09343.1     |
| alpha-amylase     | <i>Pristhesancus plagipennis</i> | ATU82842.1     |
| alpha-amylase     | <i>Riptortus pedestris</i>       | BAN20159.1     |
| predicted protein | <i>Riptortus pedestris</i>       | BAN20192.1     |
| <b>ScSUH</b>      | <i>Samia cynthia ricini</i>      | BAP18685.1     |
| ScMal1            | <i>Samia cynthia ricini</i>      | BBD13389.1     |

|              |                             |                |
|--------------|-----------------------------|----------------|
| ScMal2       | <i>Samia cynthia ricini</i> | BBD49476.1     |
| SISUH1       | <i>Spodoptera litura</i>    | XP_022821249.1 |
| SISUH2       | <i>Spodoptera litura</i>    | XP_022821250.1 |
| SIMal1_1     | <i>Spodoptera litura</i>    | XP_022816388.1 |
| SIMal1_2     | <i>Spodoptera litura</i>    | XP_022816674.1 |
| SIMal3       | <i>Spodoptera litura</i>    | XP_022820326.1 |
| SIMal4       | <i>Spodoptera litura</i>    | XP_022820325.1 |
| <b>TvSUH</b> | <i>Trilocha varians</i>     | BAP18684.1     |
| TvMal1       | <i>Trilocha varians</i>     | BBD13388.1     |
| TvMal2       | <i>Trilocha varians</i>     | BBD49475.1     |

---

<sup>a</sup> Enzymatically characterized proteins (except for partially purified enzymes) are highlighted in bold.

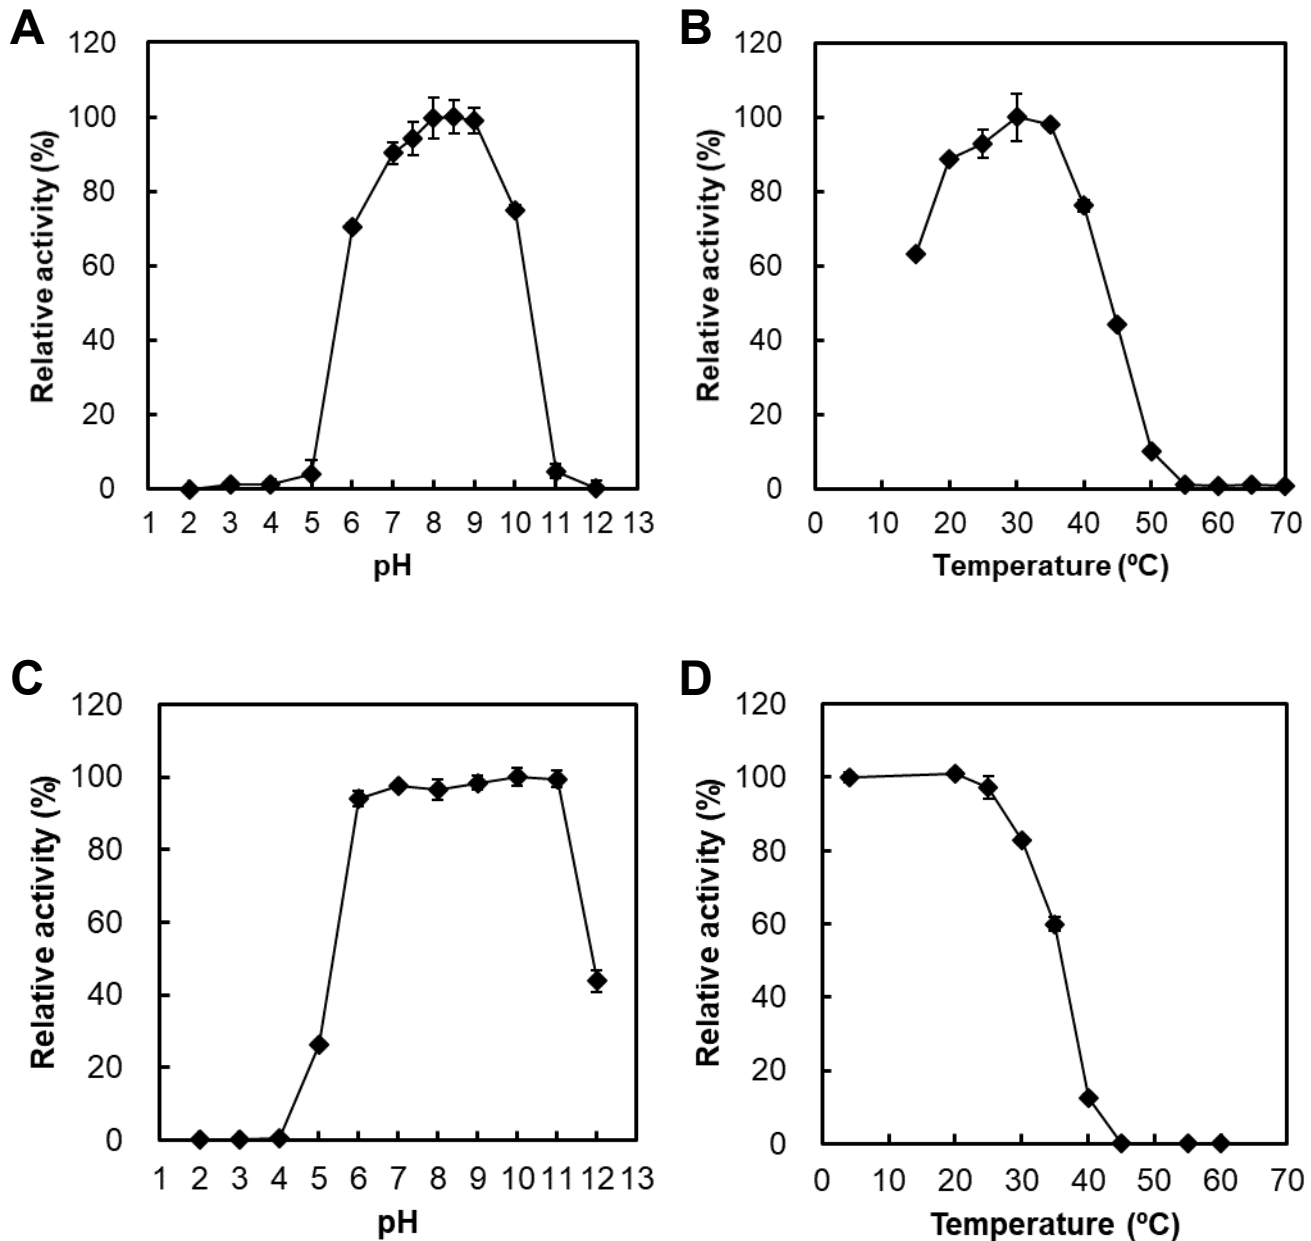

**Supplementary Figure S1. Effects of pH and temperature on the recombinant BmSUH hydrolysis of sucrose.**

pH dependence (A), temperature dependence (B), pH stability (C), and thermostability of BmSUH. pH dependence was measured at 30 °C using Britton-Robinson buffer (pH 2.0–12), and temperature dependence was measured at 15 °C–70 °C using 50 mM HEPES-NaOH buffer (pH 8.0). pH stability was measured at 30 °C using enzymes after incubation in buffer with varying pH for 24 h at 4 °C. Thermostability was measured at 30 °C using enzymes pre-incubated at varying temperature for 30 min. All experiments were performed in triplicate.



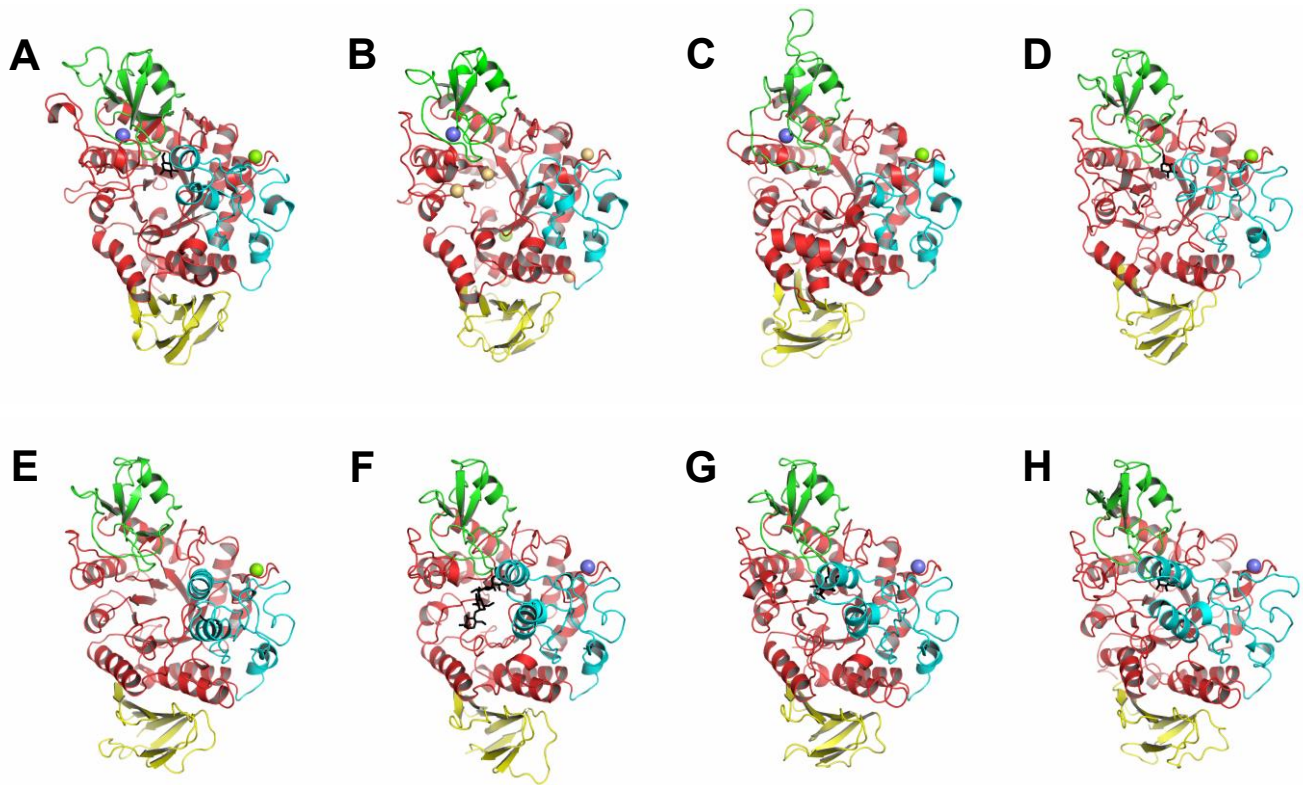

**Supplementary Figure S2. Structures of *exo*-acting GH13 enzymes homologous to BmSUH.**

(A) *B. mori* GH13\_17 sucrose hydrolase BmSUH (this study), (B) *C. quinquefasciatus* GH13\_17 maltase Cqm1, (C) *D. radiodurans* GH13\_16 trehalose synthase, (D) *Halomonas* sp. H11 GH13\_23  $\alpha$ -glucosidase HaG, (E) *B. licheniformis* GH13\_29 trehalose-6-phosphate hydrolase, (F) *Bacillus* sp. AHU2216 GH13\_31  $\alpha$ -glucosidase, (G) *P. mesoacidophila* GH13\_31 sucrose isomerase, (H) *S. cerevisiae* GH13\_40 oligo- $\alpha$ -1,6-glucosidase. Colors and symbols used are as follows: domain A, red; domain B, green; domain B', cyan; domain C, yellow; calcium ion, slate blue sphere; magnesium ion, light green sphere; cadmium ion, light brown sphere; ligands in the active centers, black stick.

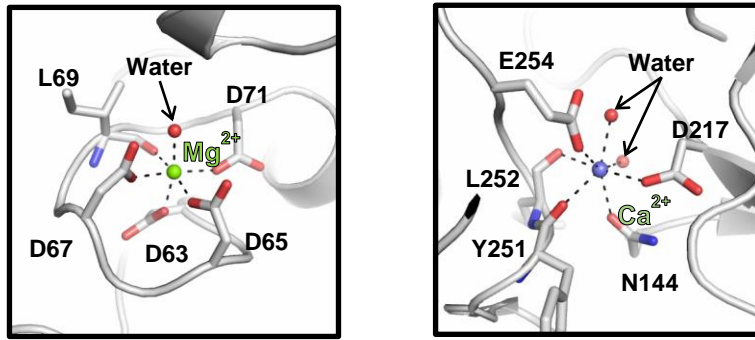

**Supplementary Figure S3. Metal binding sites of BmSUH.**

The amino acid residues that coordinate magnesium ion (*light green sphere*) in site I (*left panel*) and calcium ion (*slate blue sphere*) in site II (*right panel*) are shown in *stick models*.

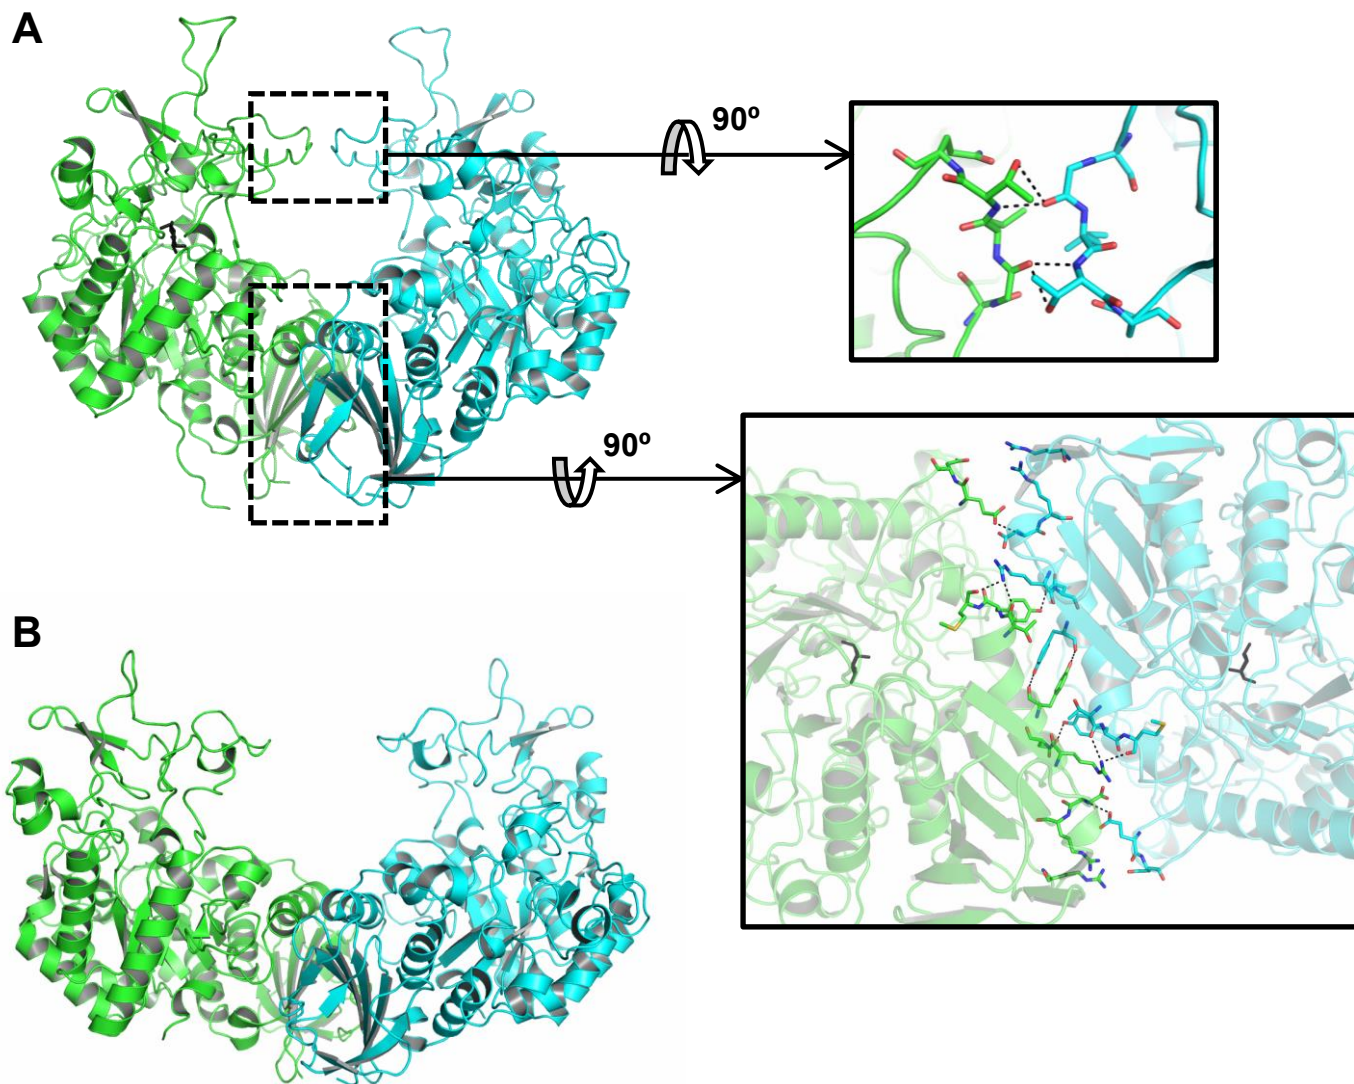

**Supplementary Figure S4. Dimeric structures of BmSUH (A) and Cqm1 (B).**

Two monomers are shown in *green* and *cyan*. In (A), amino acid residues located at the dimer interfaces are shown as *stick* models and hydrogen bonds are shown as *dashed lines*.



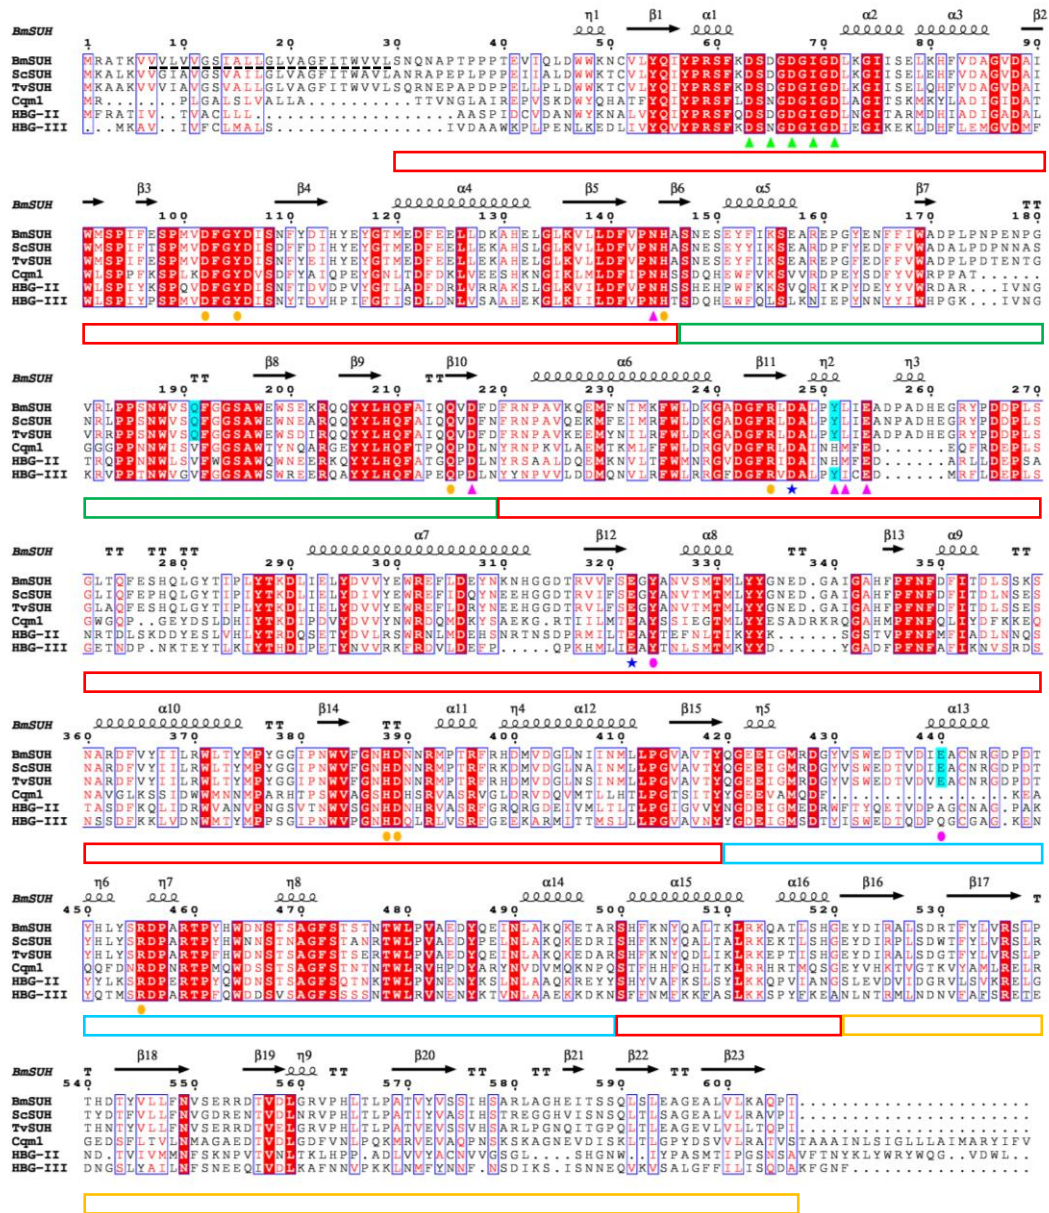

### Supplementary Figure S5. Sequence alignment of GH13\_17 enzymes.

The sequences of GH13\_17 enzymes were aligned using Clustal Omega [x] and the figure generated by ESPrnt 3.0. Sequences used are BmSUH (GenBank BAP18683.1), *Samia cynthia ricini* sucrose hydrolase (ScSUH, BAP18685.1), *Trilocha varians* sucrose hydrolase (TvSUH, BAP18684.1), Cqm1 (ASO96882.1), honeybee (*Apis mellifera*)  $\alpha$ -glucosidase II (HBG-II, BAE86927.1), and honeybee  $\alpha$ -glucosidase III (HBG-III, BAA11466.1). Secondary structures and domain architecture of BmSUH are described above and under sequences, respectively. Colors for the domains are as follows: domain A, red; domain B, green; domain B', cyan; domain C, yellow. The predicted transmembrane region is underlined with a dashed line. Identical residues are shown in white with a red background and conservative changes in red with a white background. The amino acid residues mutated in this study (Gln191, Tyr251, and Glu440) and their conserved residues are highlighted in cyan. Catalytic residues are marked with blue stars, and residues that interact with glucose and fructose residues of substrates are orange and magenta circles, respectively, under sequences. Green and magenta triangles indicate the magnesium- and calcium-binding residues of BmSUH, respectively.

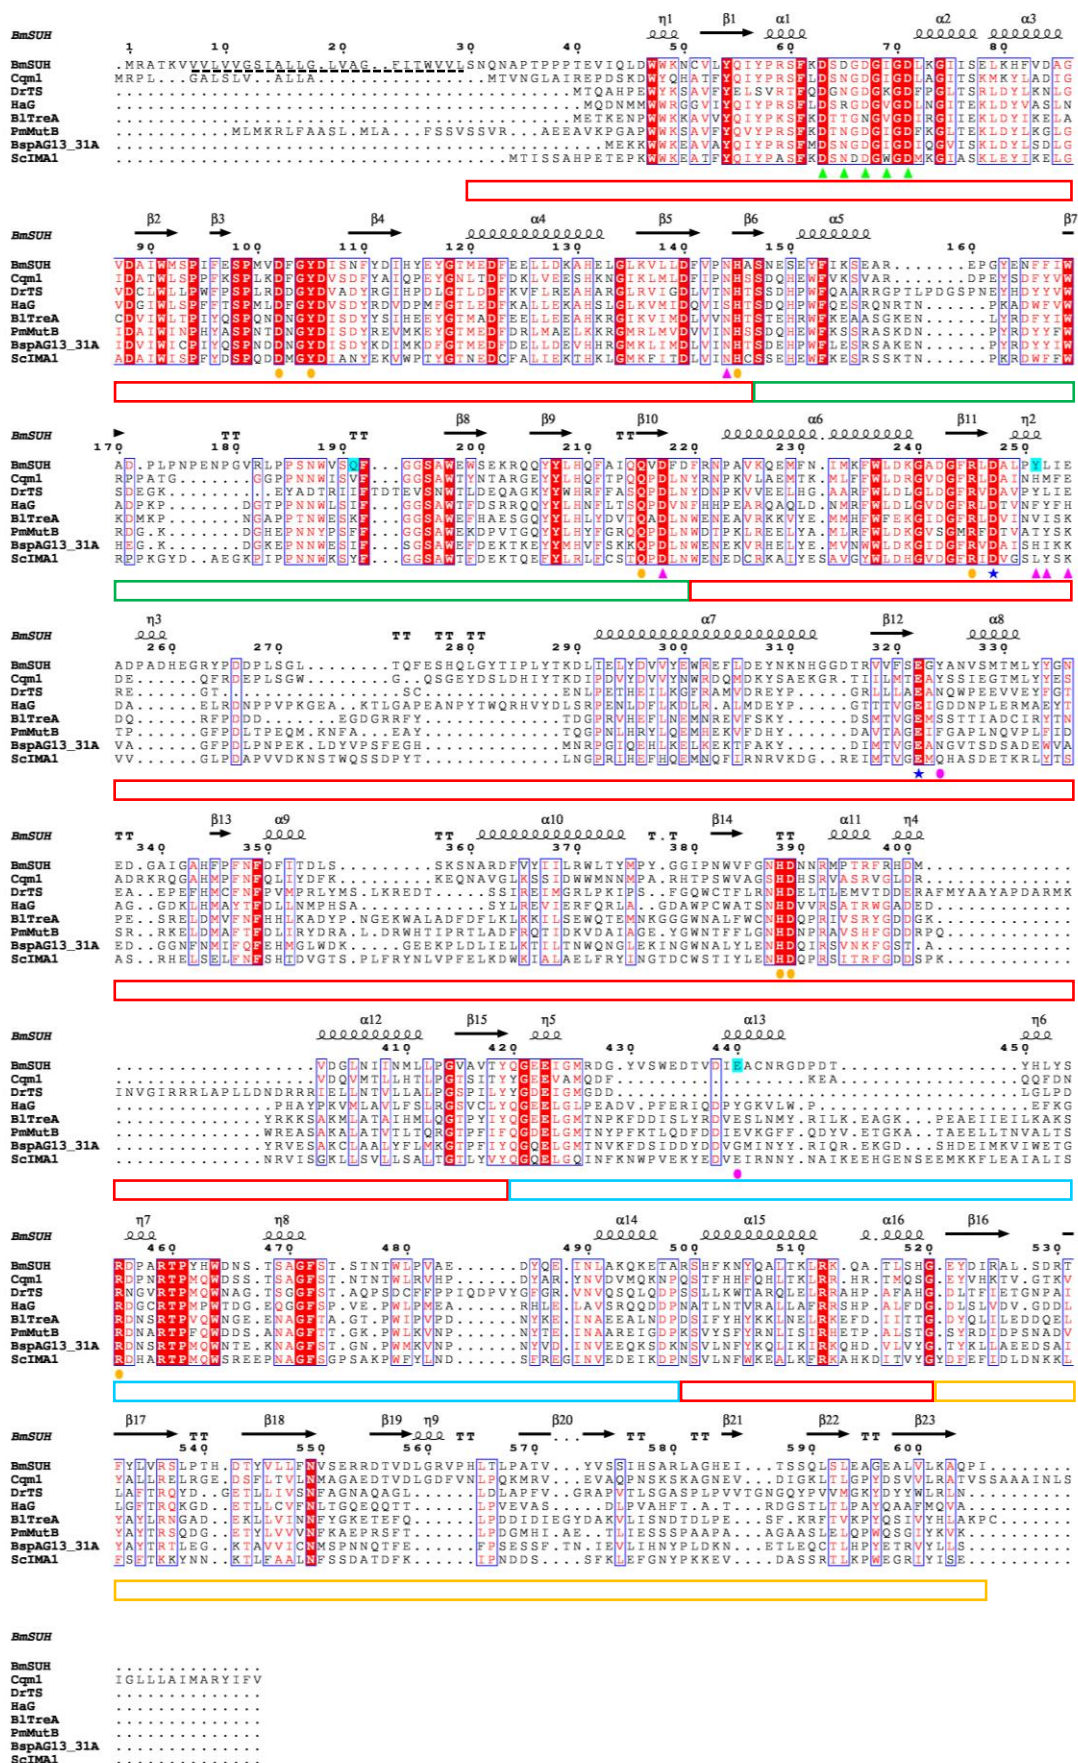

**Supplementary Figure S6. Sequence alignment of *exo*-acting enzymes belonging to GH13\_16, 17, 23, 29, 31, and 40 subfamilies.**

The alignment was prepared and described in the same manner as Figure S5. Sequences used are BmSUH (GenBank BAP18683.1), Cqm1 (ASO96882.1), *D. radiodurans* GH13\_16 trehalose synthase (DrTS, AAF11586.1), *Halomonas* sp. H11 GH13\_23  $\alpha$ -glucosidase (HaG, BAL49684.1), *B. licheniformis* GH13\_29

trehalose-6-phosphate hydrolase (BTreA, AAU39732.1), *P. mesoacidophila* GH13\_31 sucrose isomerase (PmMutB, ABC33903.1), *Bacillus* sp. AHU2216 GH13\_31  $\alpha$ -glucosidase (BspAG13\_31A, BBB94188.1), and *S. cerevisiae* GH13\_40 oligo- $\alpha$ -1,6-glucosidase (ScIMA1, BAA07818.1).
